# Supplementary material for: DNA hypomethylation promotes transposable element expression and activation of immune signaling in renal cell cancer
Source: JCI journal article supplement (doi:10.1172/jci.insight.137569), 2020-06-04
Supplement: sd1 [file 1]

## Supplemental Figures

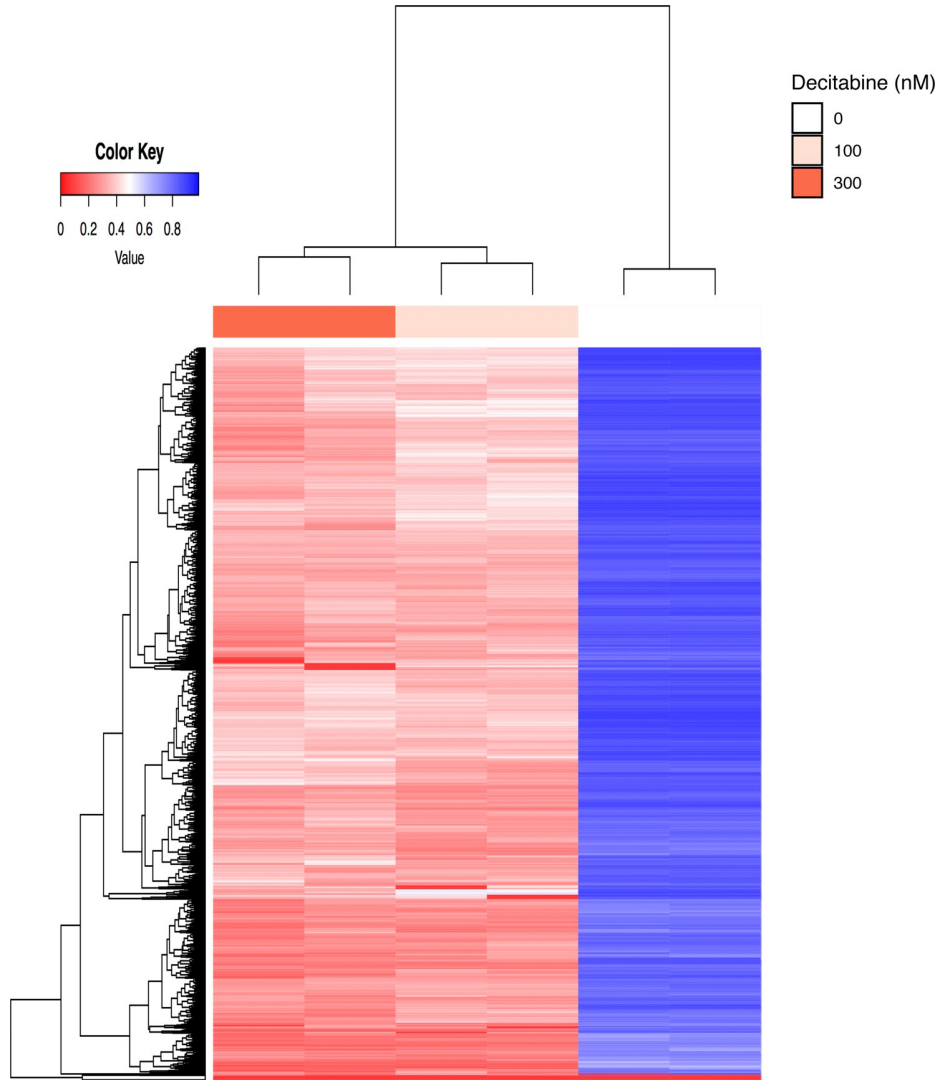

**Figure S1.** Decitabine produced dose-dependent decrease in DNA methylation in 786-0 cells. Heatmap show unsupervised cluster analysis of DNA methylation levels using the top 500 most variable probes.

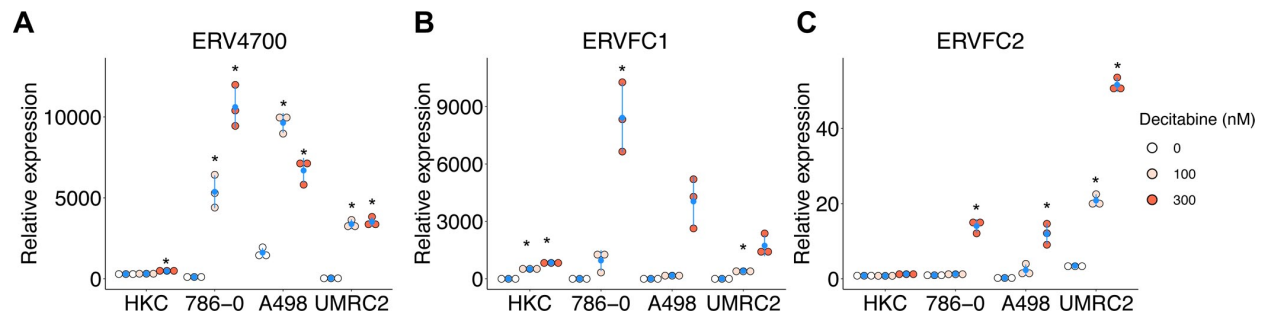

**Figure S2.** Additional ERVs upregulated by decitabine treatment. Panel of kidney cell lines were treated with decitabine for 3 days and ERV expression was assayed on day 5 by RT-qPCR. Barplots show expression values for indicated ERVs as means  $\pm$  SE (N=3). Significance assessed by T-test, and p-values were adjusted via Holm's Bonferroni correction. Asterix (\*) indicates Bonferroni corrected p-value < 0.05.

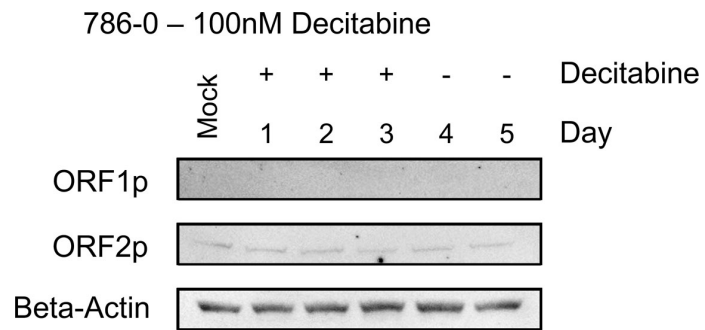

**Figure S3.** Expression of LINE-1 ORFp1 and ORFp2 proteins assessed by immunoblot analysis. Beta-Actin was used as a loading control. 786-0 cells were treated with 100nM decitabine for three days (day 0, 1 and 2) and protein was harvested at days 0 to 5. Mock treated cells were treated with DMSO for three days (day 0, 1 and 2) and protein was harvested at day 5.

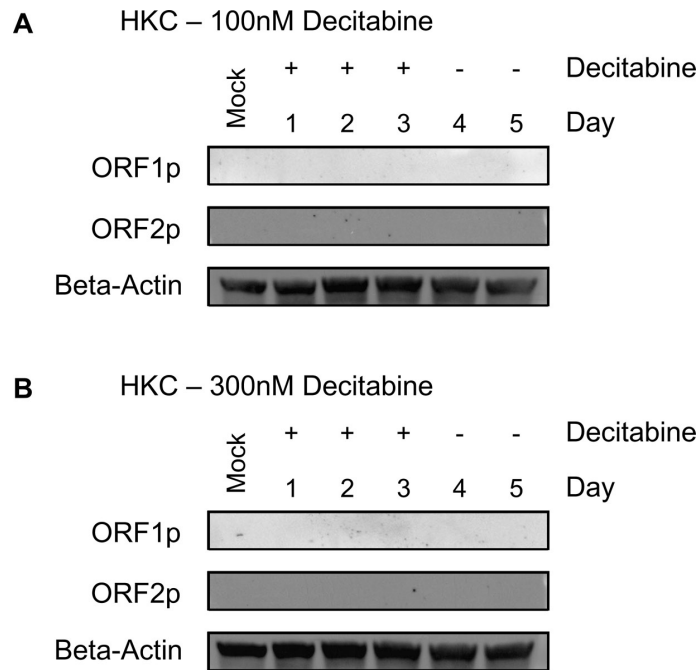

**Figure S4.** Expression of LINE-1 ORFp1 and ORFp2 proteins assessed by immunoblot analysis. Beta-Actin was used as a loading control. HKC cells were treated with A) 100nM or B) 300nM decitabine for three days (day 0, 1 and 2) and protein was harvested at days 0 to 5. Mock treated cells were treated with DMSO for three days (day 0, 1 and 2) and protein was harvested at day 5.

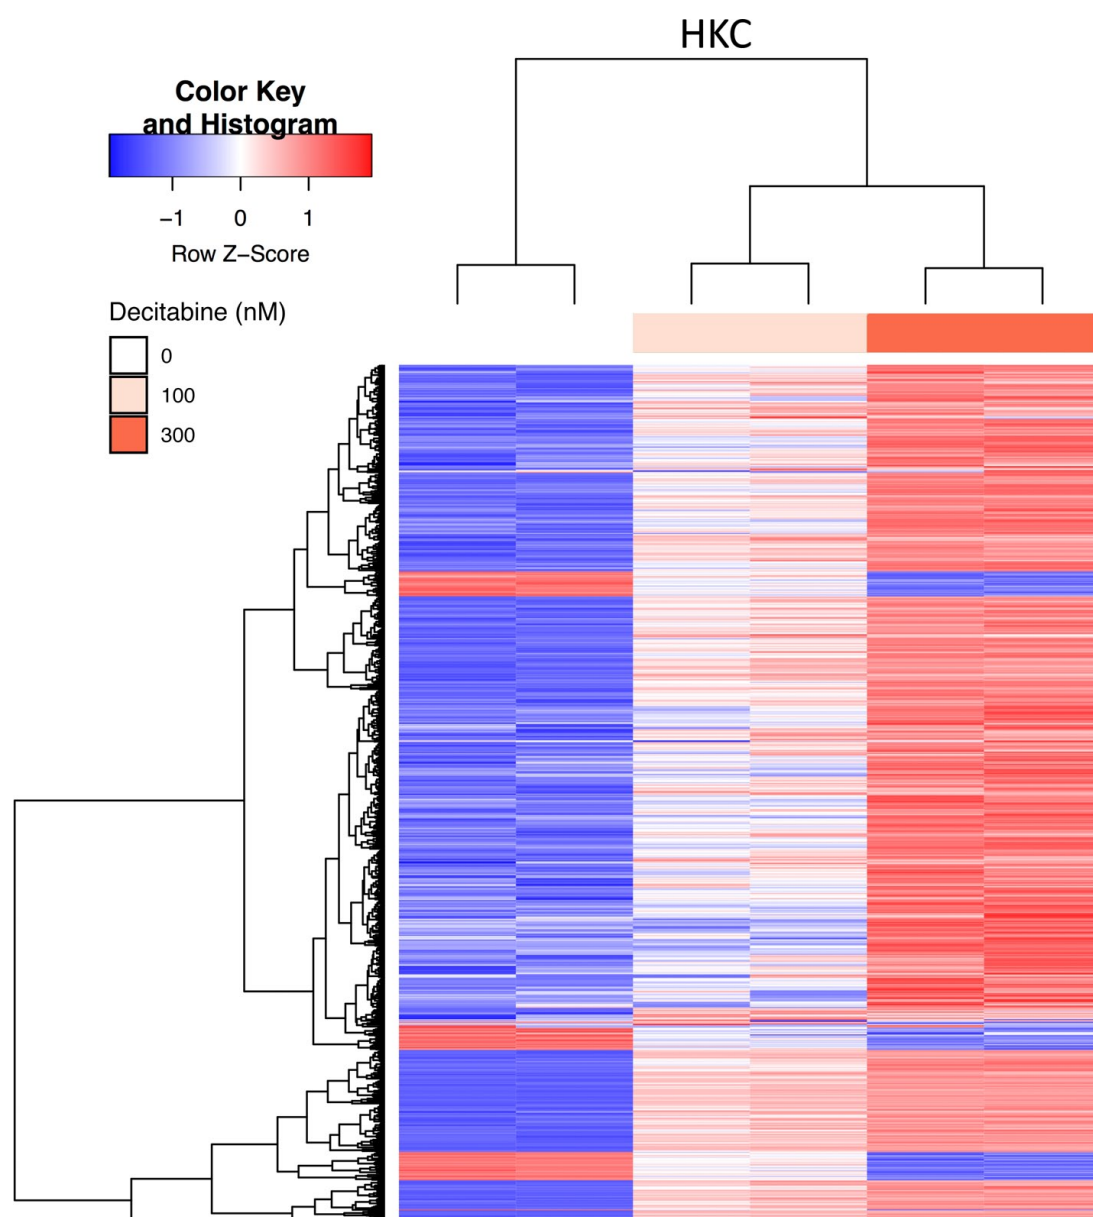

**Figure S5.** Heatmap showing unsupervised cluster analysis performed using the top 500 most variably expressed genes in HKC cells treated with (100nM and 300nM) or without (0nM) decitabine.

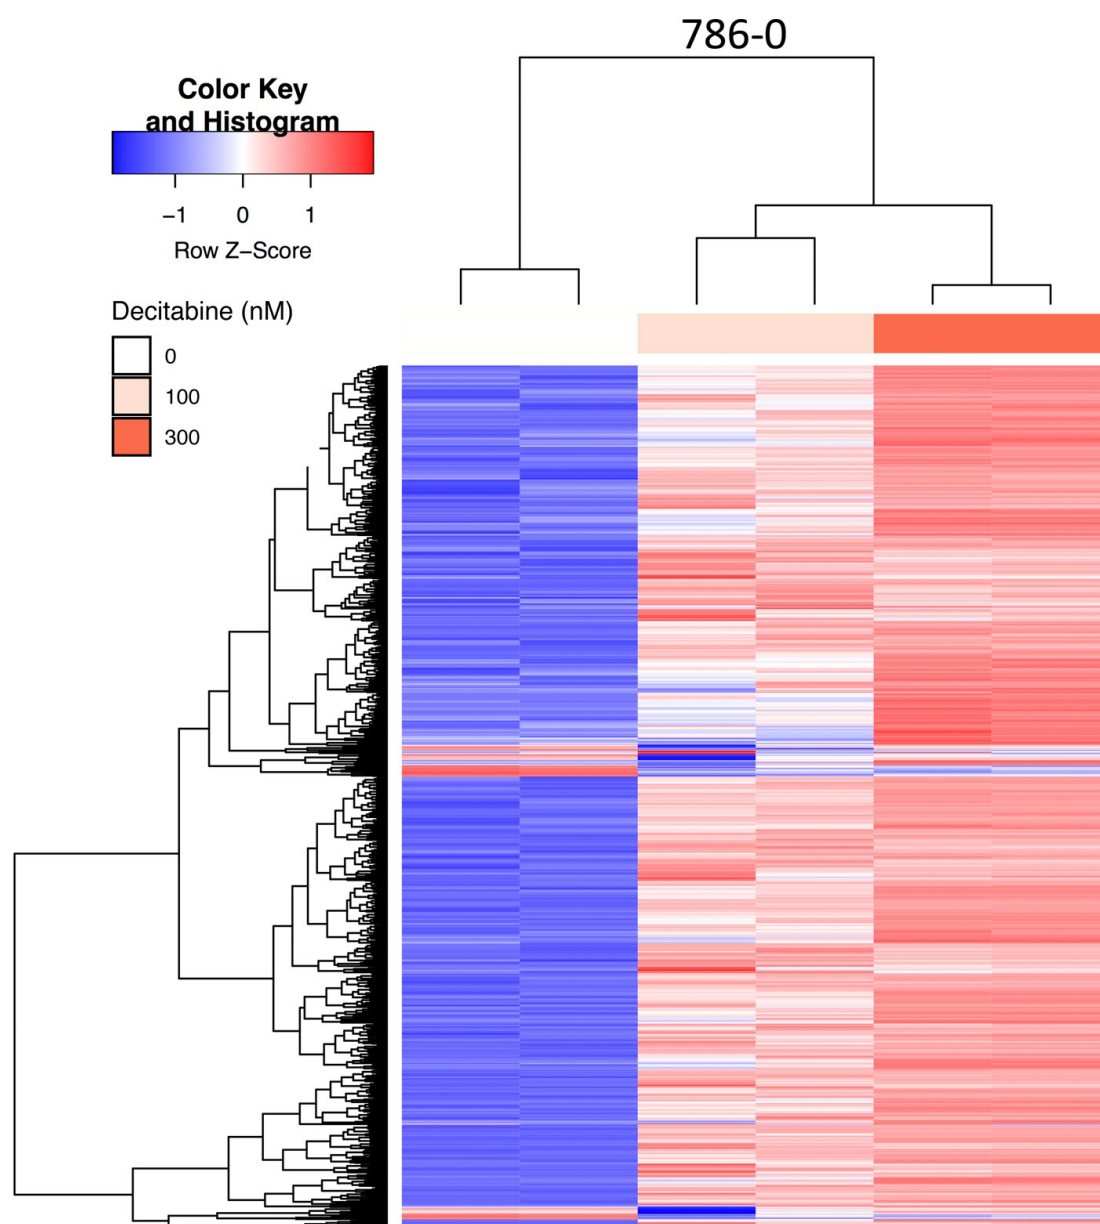

**Figure S6.** Heatmap showing unsupervised cluster analysis performed using the top 500 most variably expressed genes in 786-0 cells treated with (100nM and 300nM) or without (0nM) decitabine.

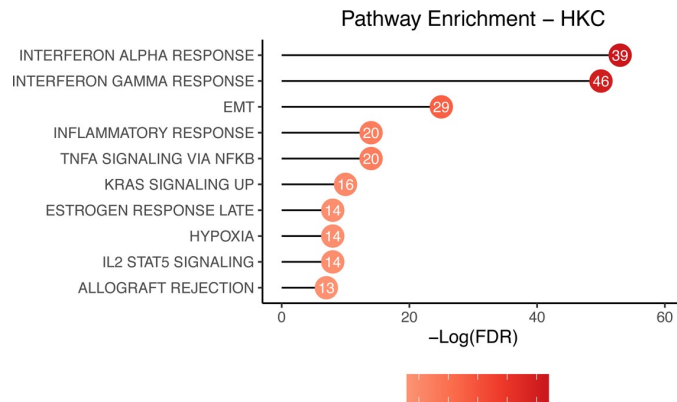

**Figure S7.** Lollipop representation of significantly enriched pathways for genes upregulated by decitabine treatment (300nM) in HKC cells as compared to DMSO vehicle (FDR<0.05 and Log2-fold > 1.5). Lollipop height and intensity color scale indicates magnitude  $-\text{Log}(\text{FDR})$  of the enrichment for each pathway. The number of genes enriched in that pathway is indicated inside each lollipop genes enriched in that pathway.

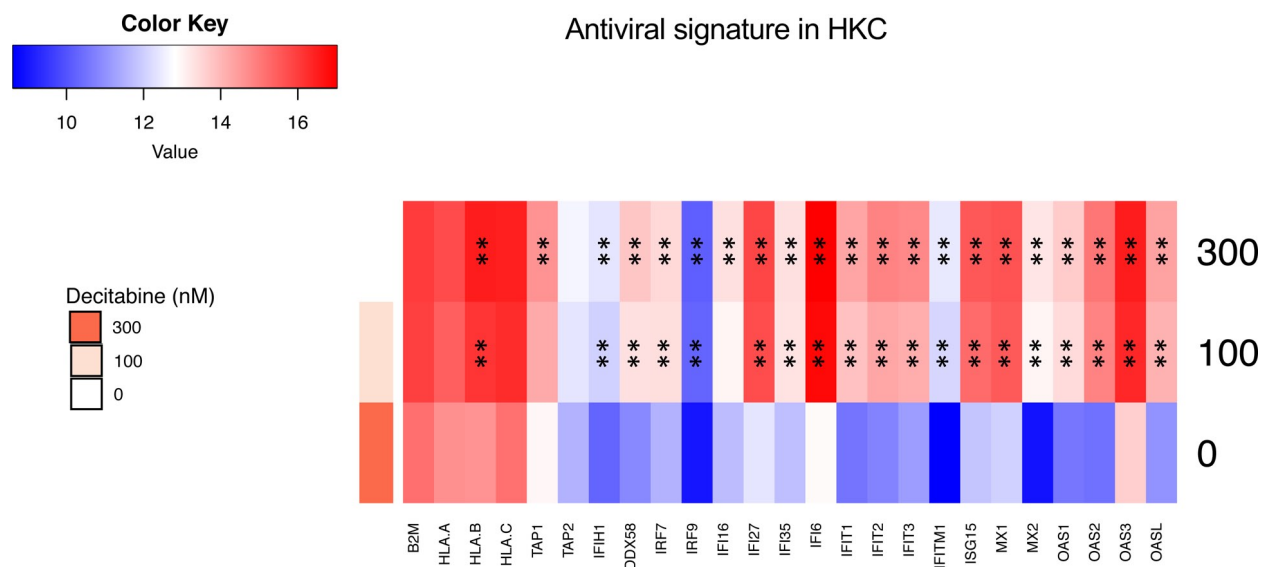

**Figure S8.** Expression levels of antiviral response genes in HKC cells treated with 0nM, 100nM and 300nM decitabine. Heatmap rows show mean expression of duplicate RNAseq measurements. Significance (100nM vs 0nM; 300nM vs 0nM) assessed by Wald test and corrected for multiple testing (FDR). Asterix (\*) indicates  $FDR < 0.05$ , and double Asterix (\*\*) indicates  $FDR < 0.001$ .



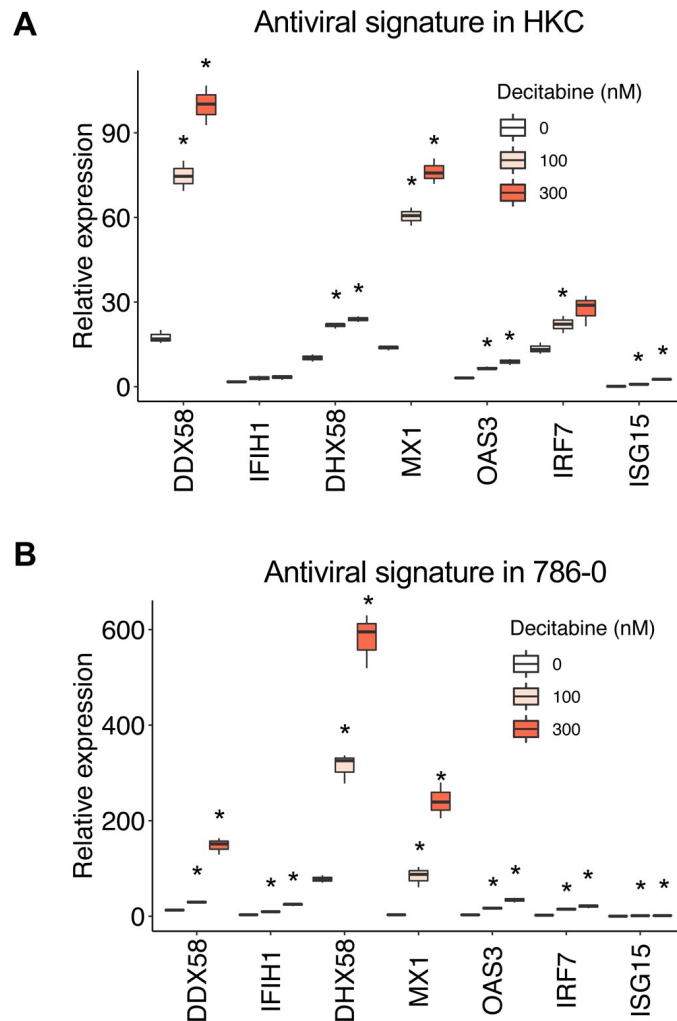

**Figure S9.** RT-qPCR assay to measure expression of antiviral response genes was measured in **A)** HKC or **B)** 786-0 cell lines. Cells were treated with DMSO or indicated doses of decitabine for 3 days, and RNA was harvested on day 5 to measure expression antiviral response genes. Barplots show expression values for indicated ERVs as means  $\pm$  SE (N=3). Significance assessed by paired T-test. Asterix (\*) indicates Bonferroni corrected p-value  $< 0.05$ .

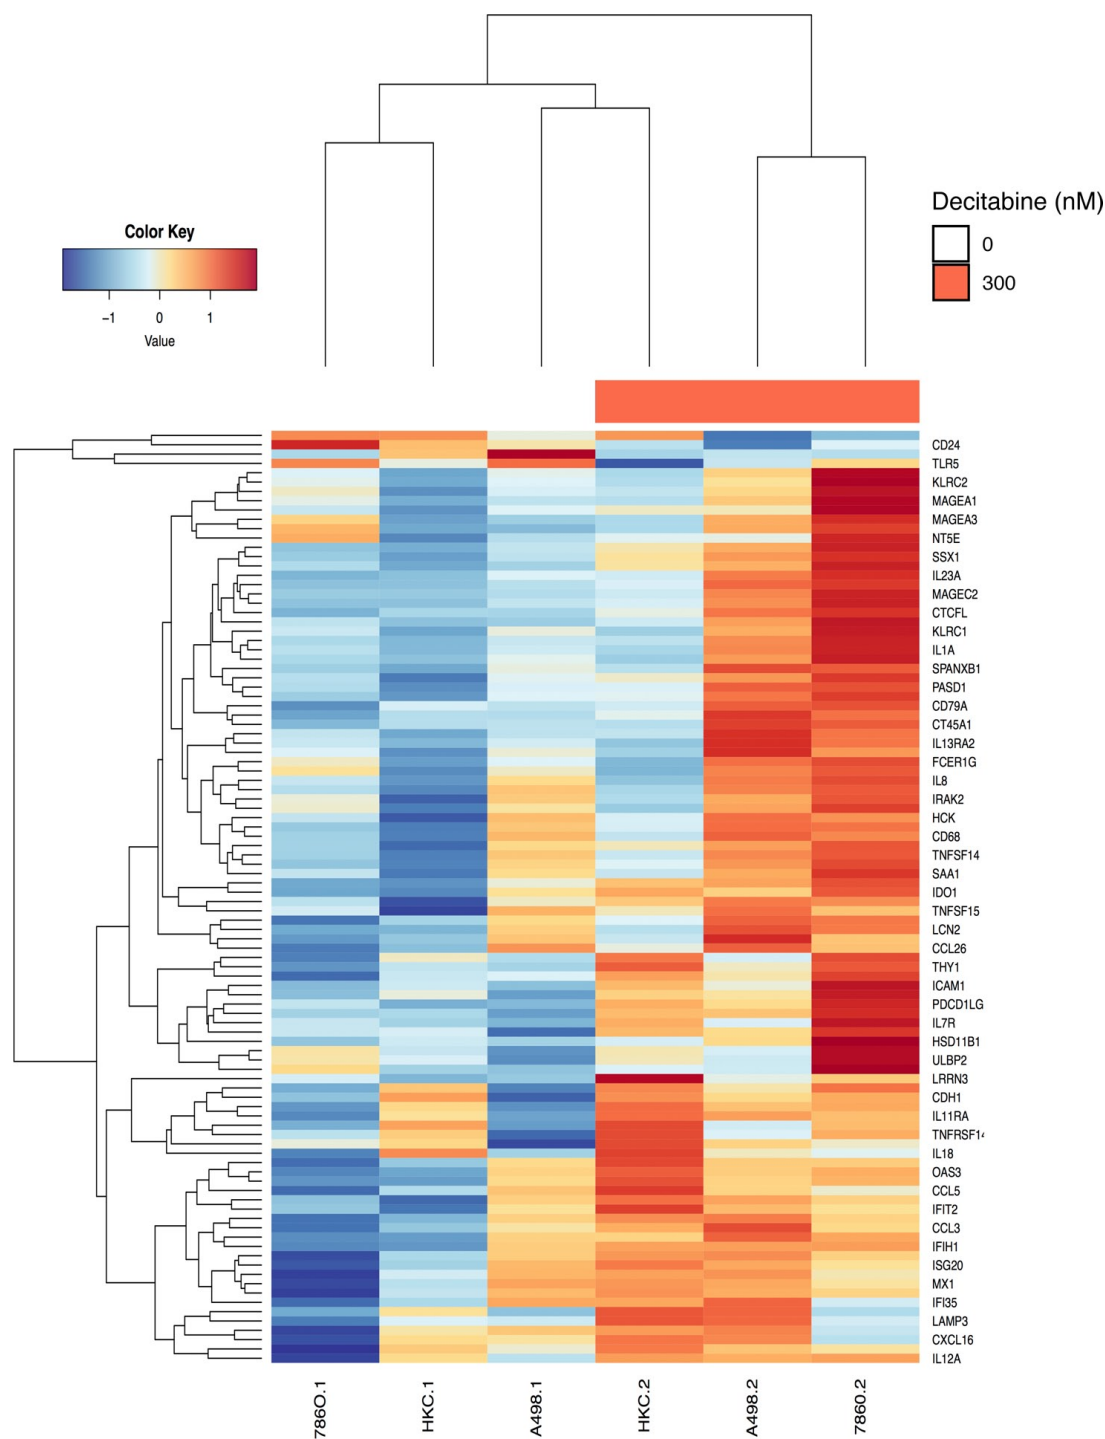

**Figure S10.** NanoString analysis using the pan-cancer immune panel was performed in kidney cell lines (HKC, A498 and 786-0) treated with 0nM or 300nM decitabine. Heatmap shows unsupervised analysis performed using the top 50 most variably expressed genes.

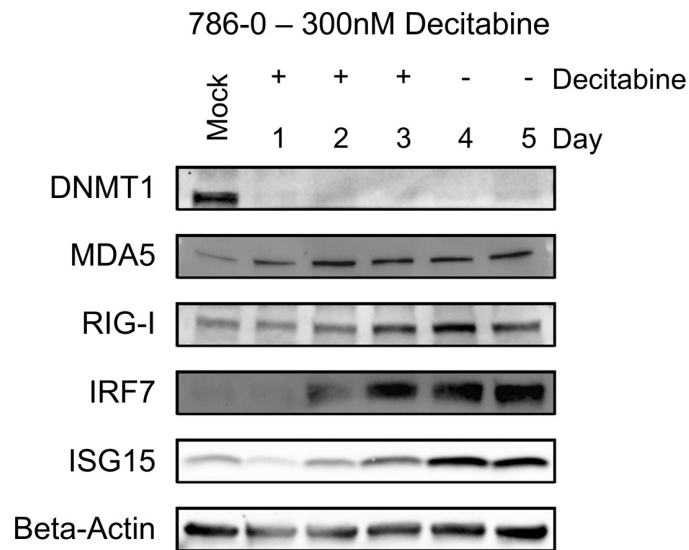

**Figure S11.** Antiviral protein levels were assessed by immunoblot analysis in 786-0 cells were treated with 300nM decitabine for three days (day 0, 1 and 2) and protein was harvested at days 0 to 5. Mock treated cells were treated with DMSO for three days (day 0, 1 and 2) and protein was harvested at day 5. Protein expression levels of DNMT1, RIG-I, DDX58, IRF7, ISG15, and Beta-Actin were assessed by immunoblot. Beta-Actin was used as a loading control.

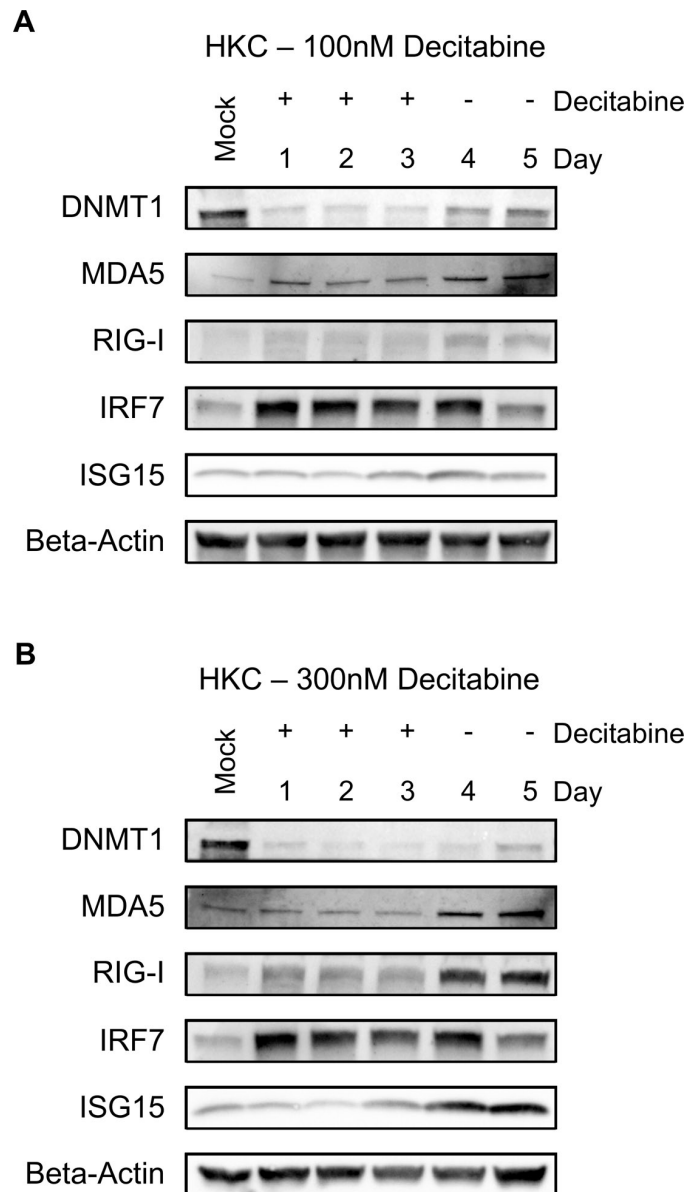

**Figure S12.** Antiviral protein levels were assessed by immunoblot analysis in HKC cells were treated with **A**) 100nM or **B**) 300nM decitabine for three days (day 0, 1 and 2) and protein was harvested at days 0 to 5. Mock treated cells were treated with DMSO for three days (day 0, 1 and 2) and protein was harvested at day 5. Protein expression levels of DNMT1, RIG-I, DDX58, IRF7, ISG15, and Beta-Actin were assessed by immunoblot. Beta-Actin was used as a loading control.

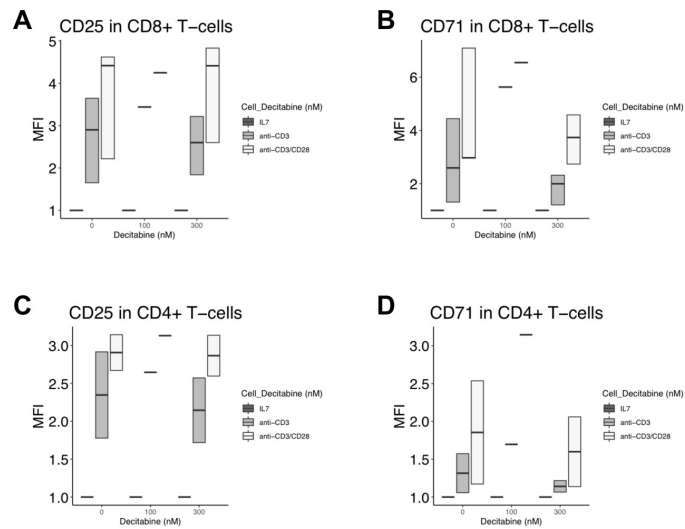

**Figure S13.** T-cell Activation assay was performed in healthy donor T-cells (Decitabine 0nM and 300nM n=5; Decitabine 100nM n=3) treated with 0nM, 100nm and 300nM decitabine. T-cells were stimulated with IL7, anti-CD3 or anti-CD3/CD28 for 5 days before measuring cell size and expression of CD4, CD8, CD25, and CD71 by flow cytometry.
